# Supplementary material for: A novel non-viral gene vector for hepatocyte-targeting and in situ monitoring of DNA delivery in single cells
Source: Royal Society of Chemistry journal article supplement (doi:10.1039/c6ra08935f), 2016-01-01
Supplement: c6ra08935f1.pdf [file c6ra08935f1.pdf]

**Electronic Supplementary Information**

**A novel non-viral gene vector for hepatocyte-targeting and in-situ monitoring of  
DNA delivery in single cells**

|                                     |   |
|-------------------------------------|---|
| 1. The figures of 1S, 2S, 3S and 4S | 2 |
| 2. Spectra                          | 4 |

## 1. The figures of 1S, 2S, 3S and 4S.

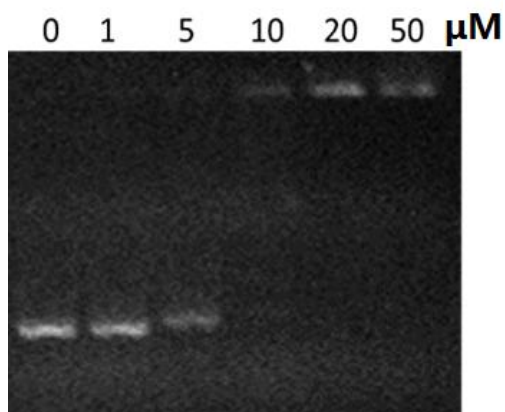

**Fig. 1S** Agarose gel electrophoresis assay to investigate the pUC18DNA condensation induced by different concentrations of lipid **1** in 50 mM HEPES buffer (pH = 7.4). [DNA] = 9  $\mu\text{g}/\text{mL}$ , 37 °C incubate 5 minutes.

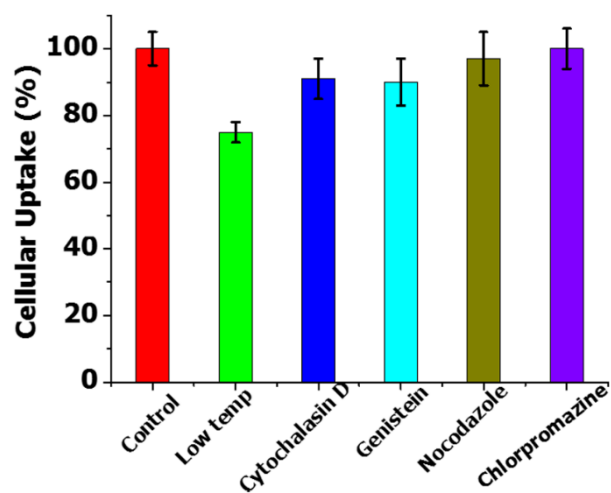

**Fig. 2S** Cellular uptake of **1**/DNA complexes (30  $\mu\text{M}$ ) quantified by flow cytometry analysis in HepG2 cells at 4 °C or in the presence of various endocytic inhibitors.

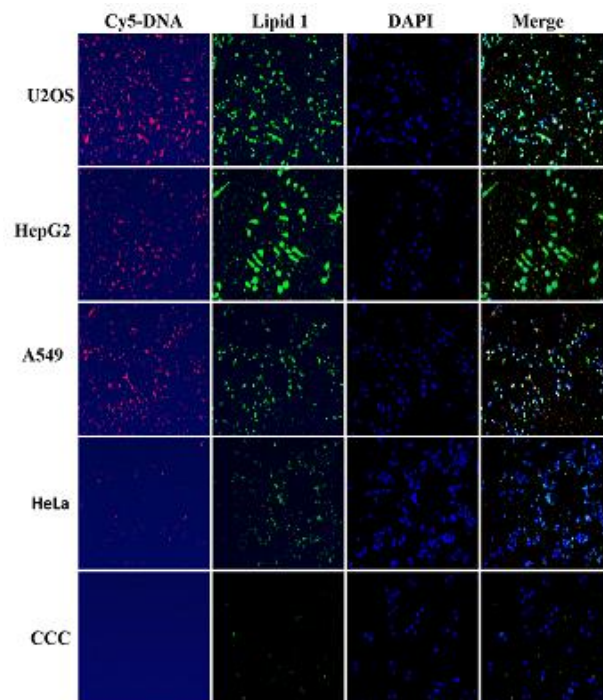

**Fig. 3S.** Confocal laser scanning microscopy imagines of cellular uptake of **1**/DNA complexes (30  $\mu$ M) in different cells.

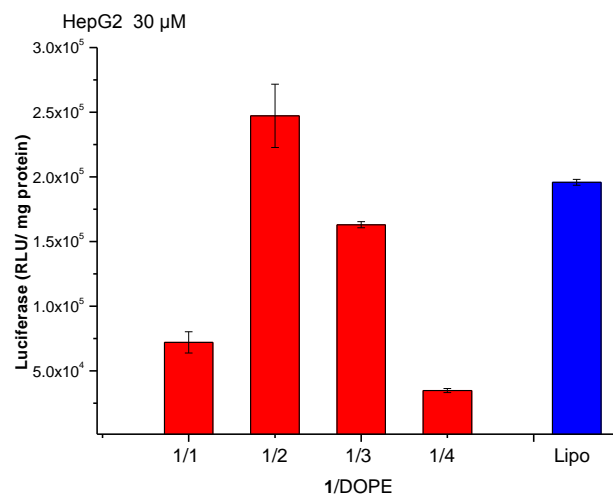

**Fig. 4S** Luciferase gene expression transfected by DNA complex of **1** (30  $\mu$ M) with different ratio of DOPE in HepG2 cells.

## 2. Spectra

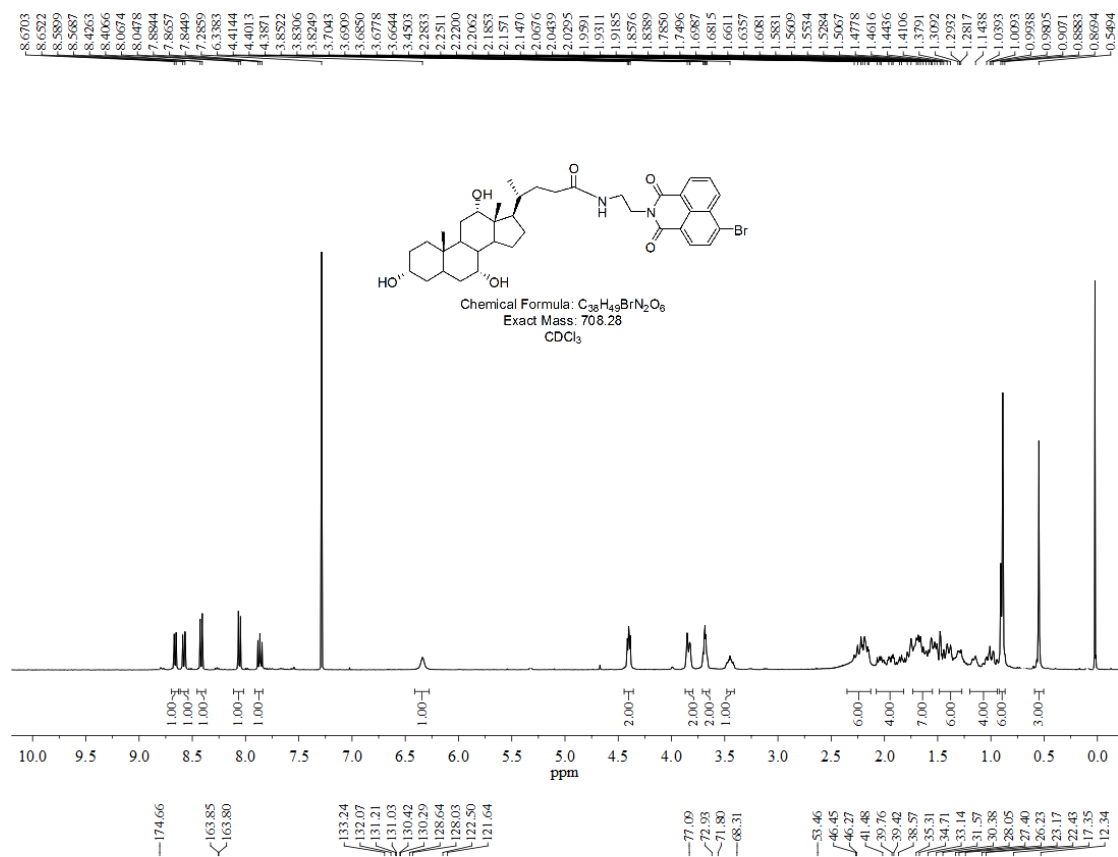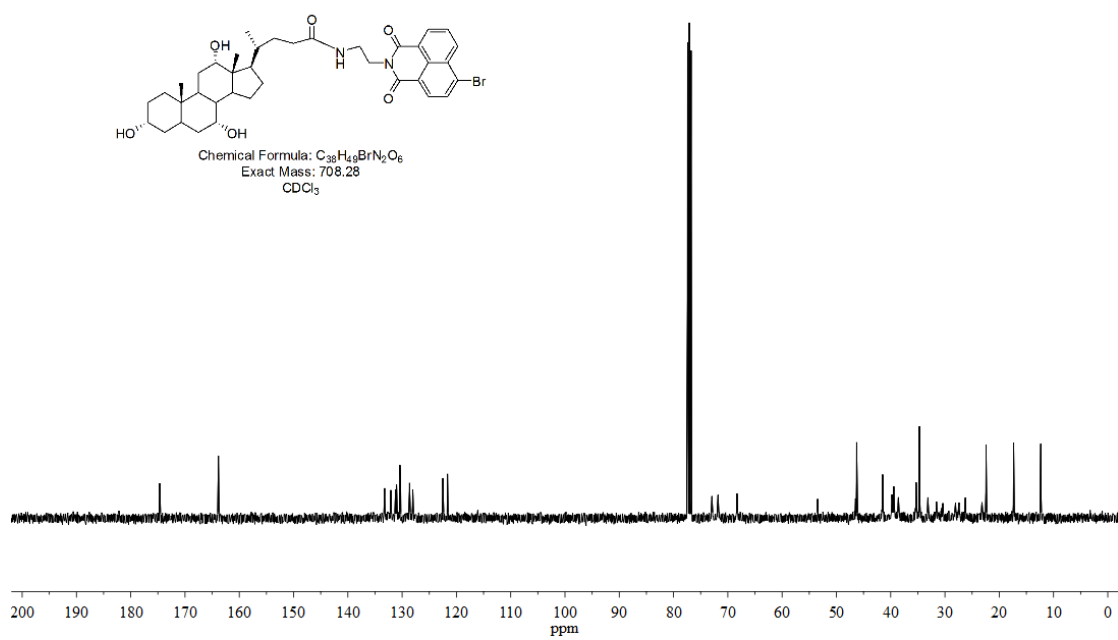

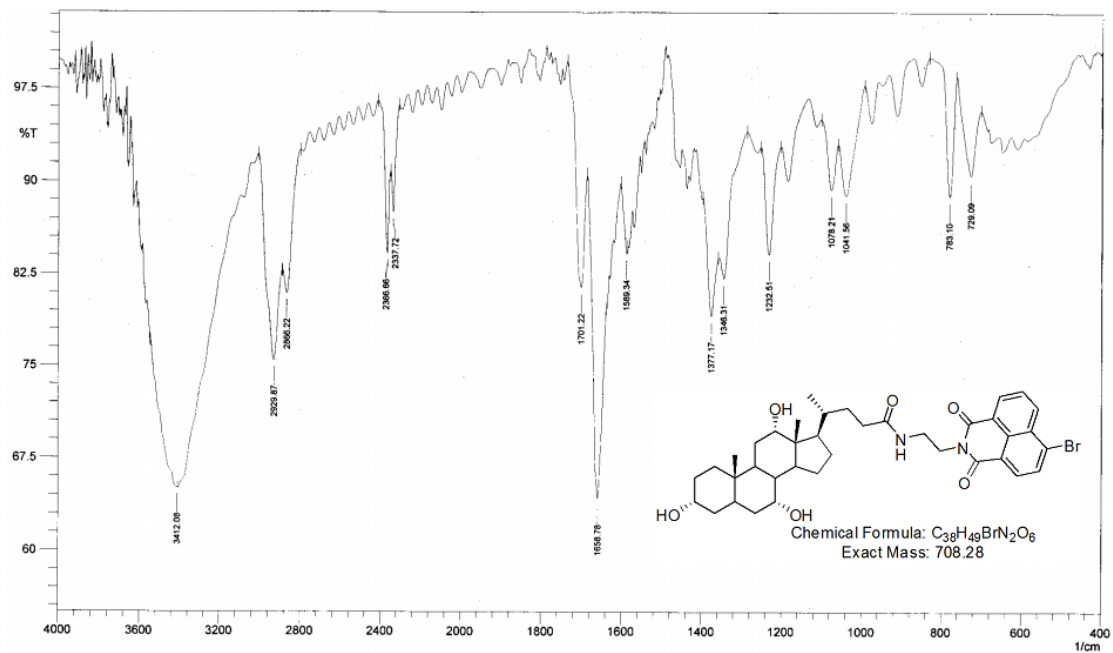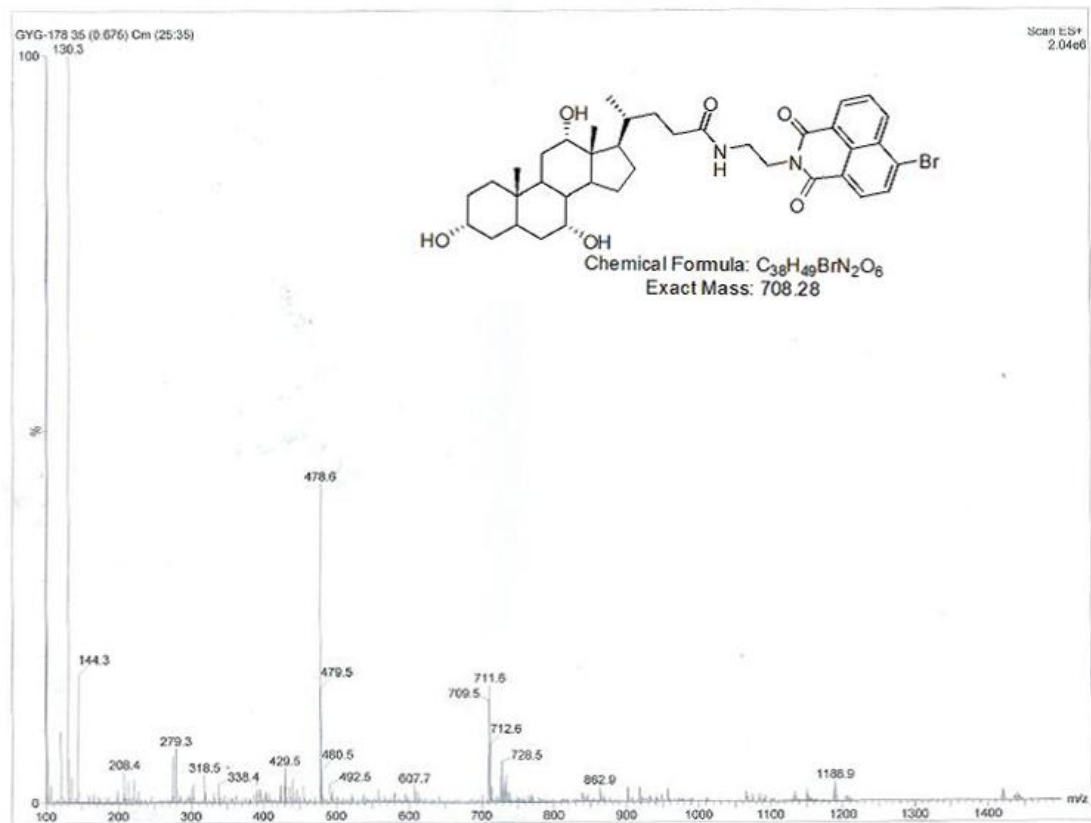

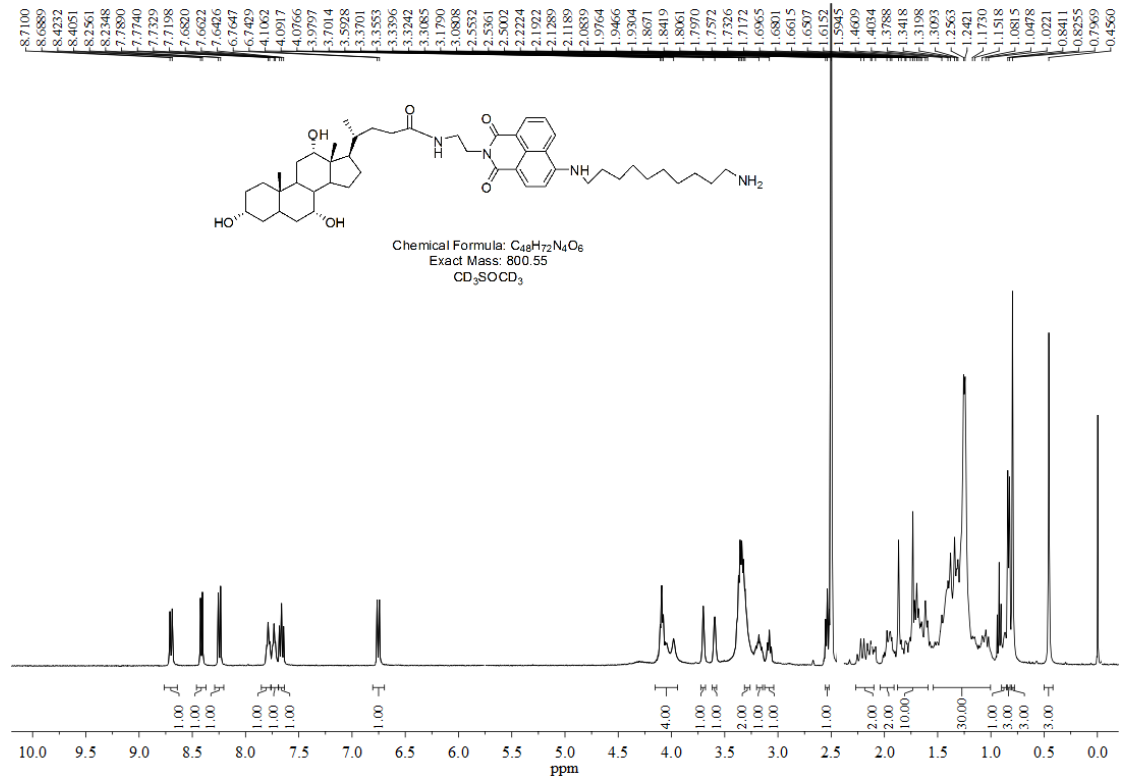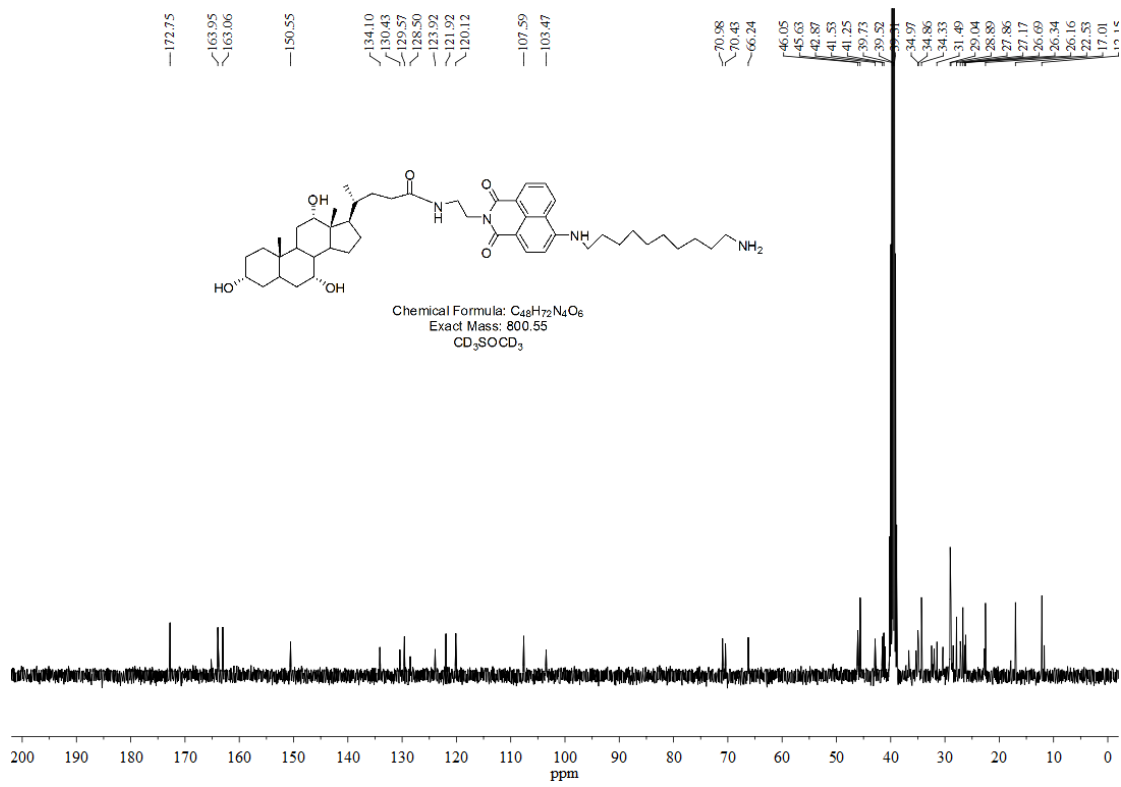

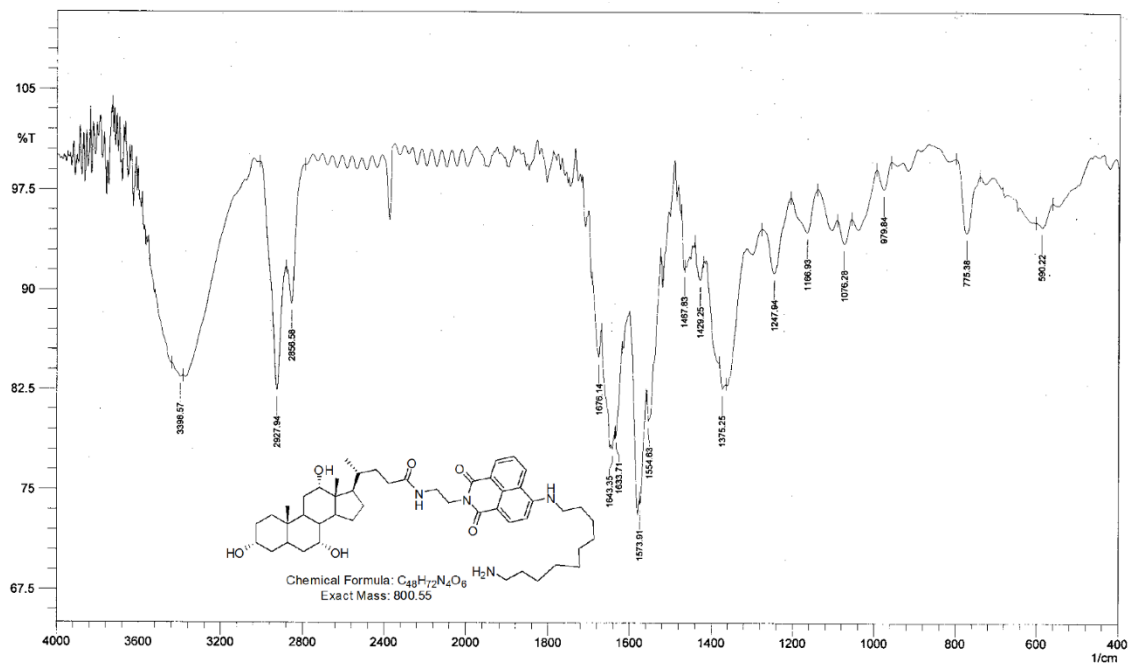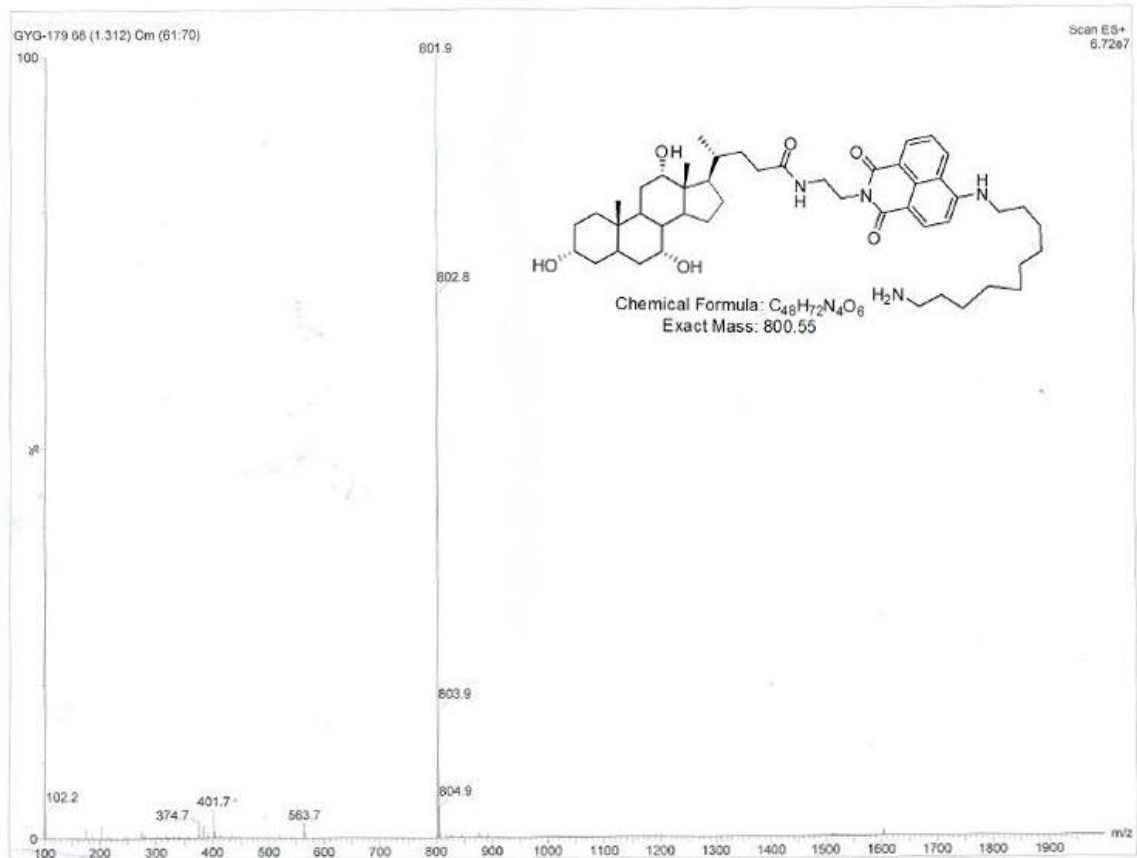

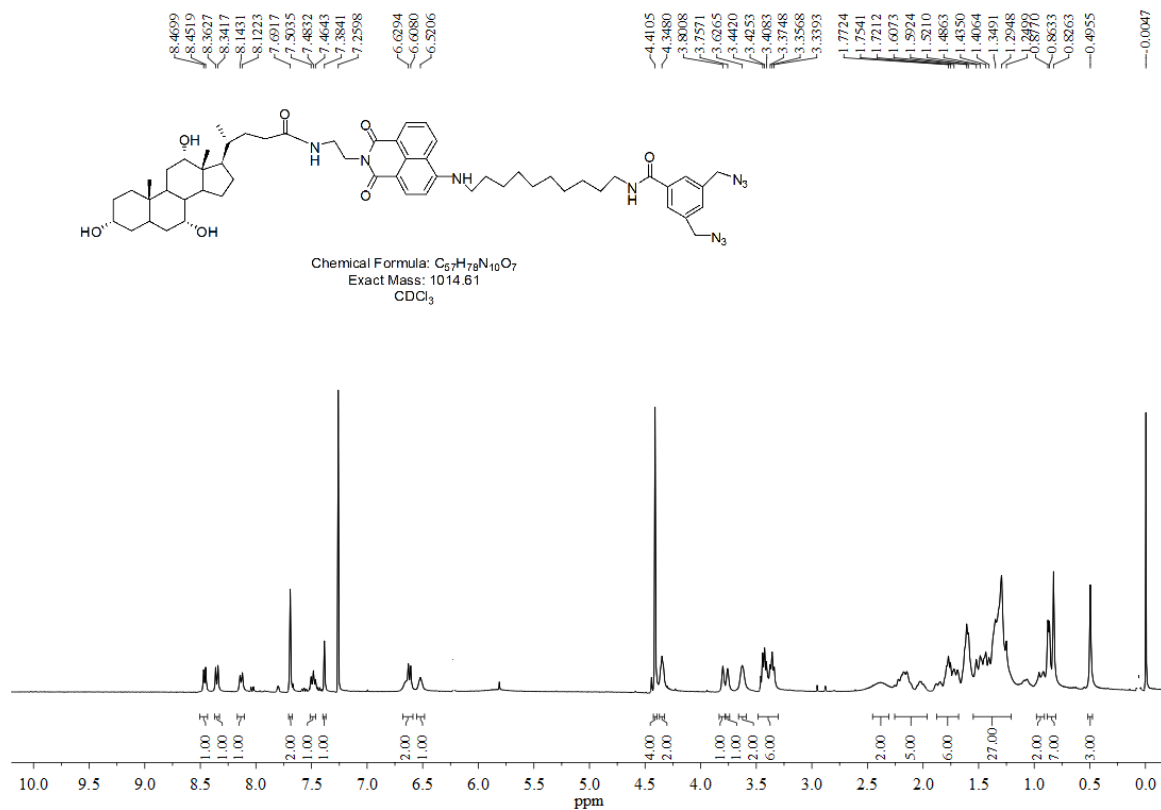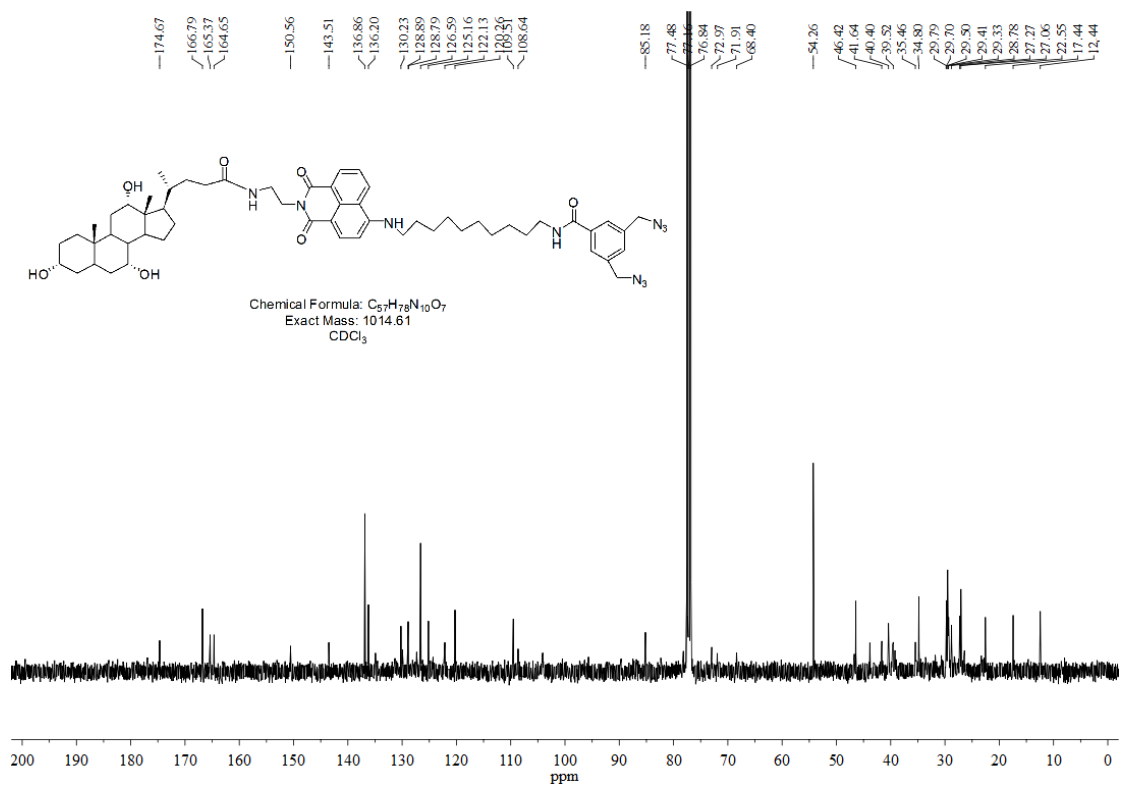



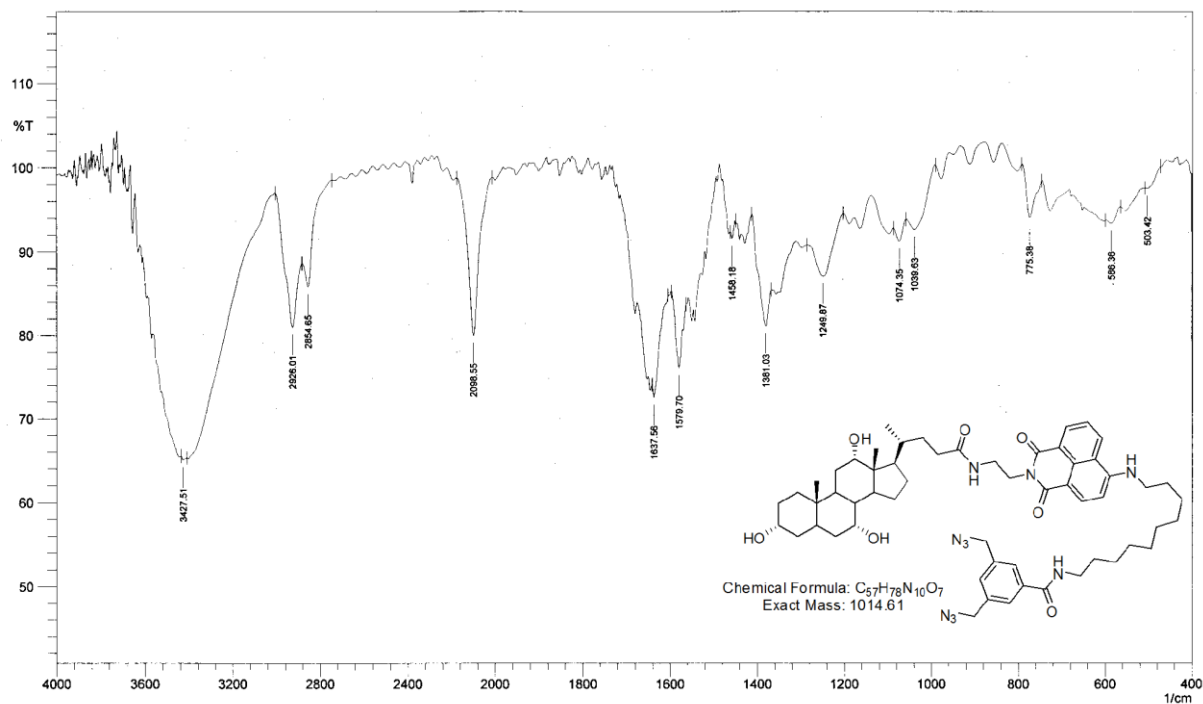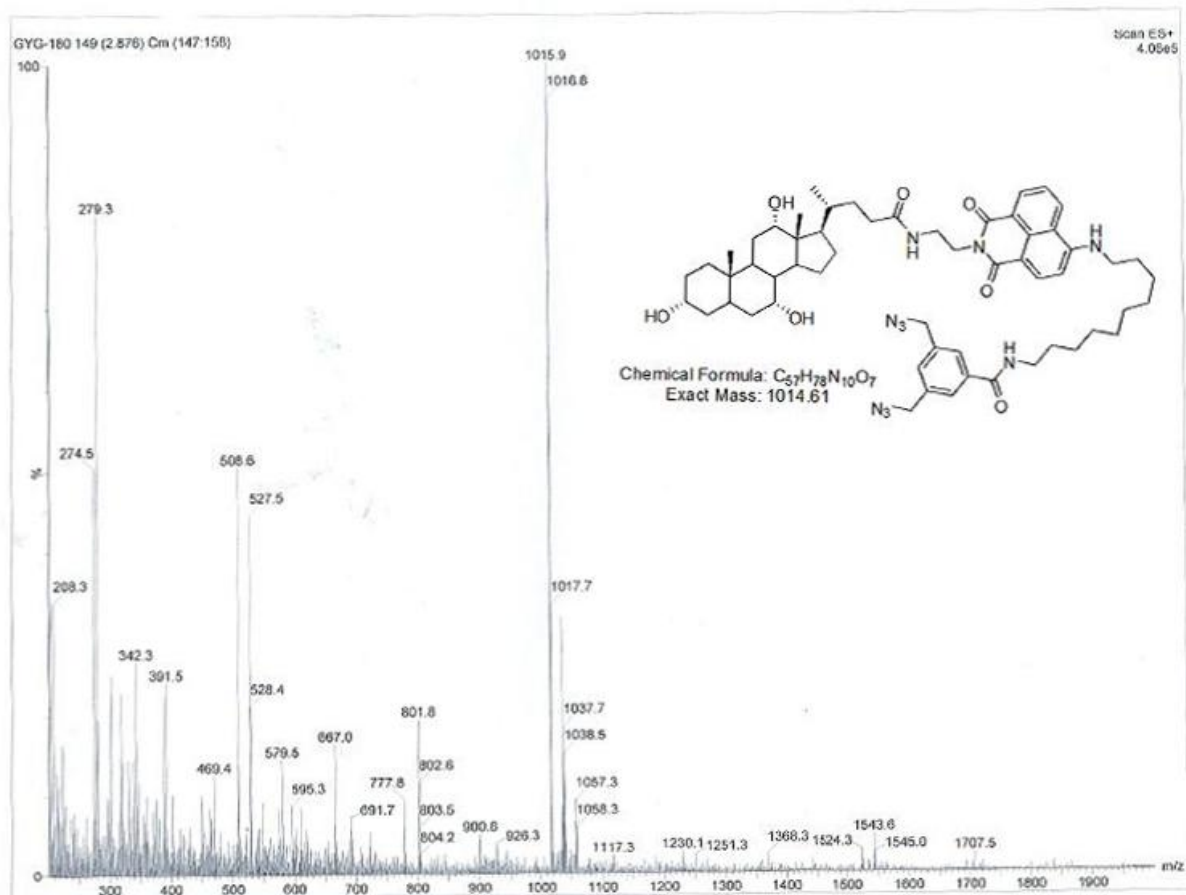

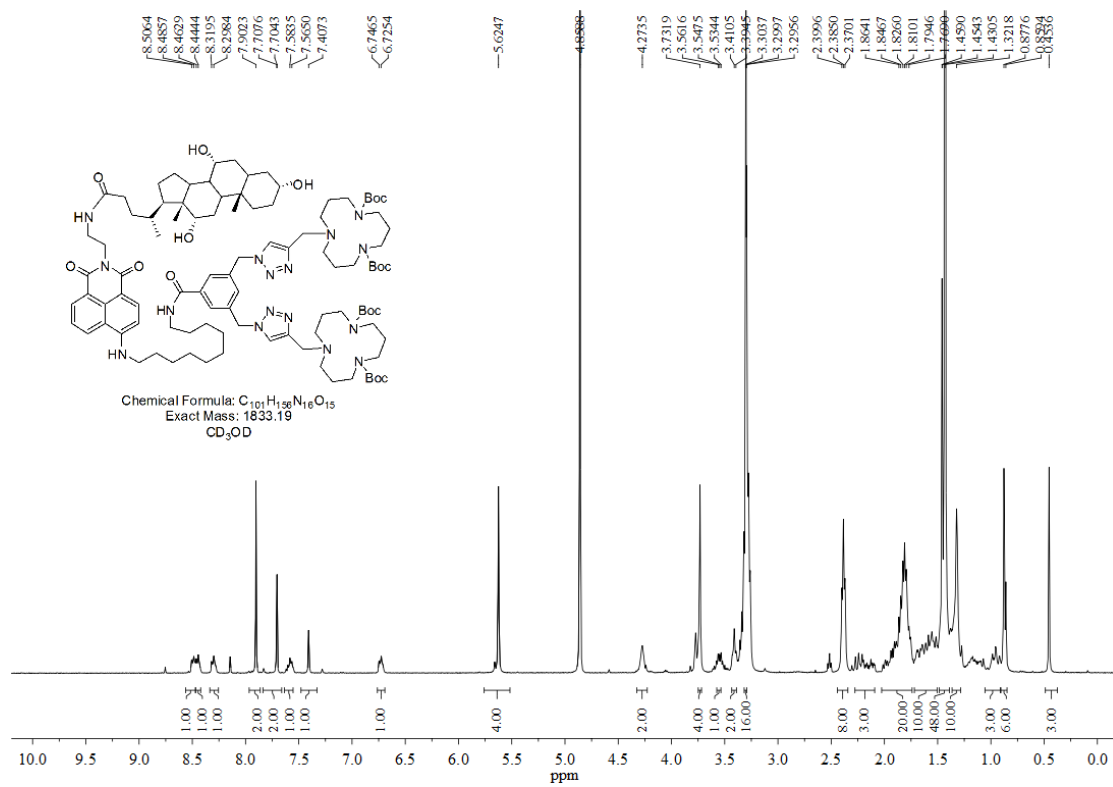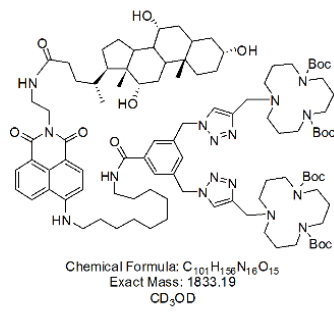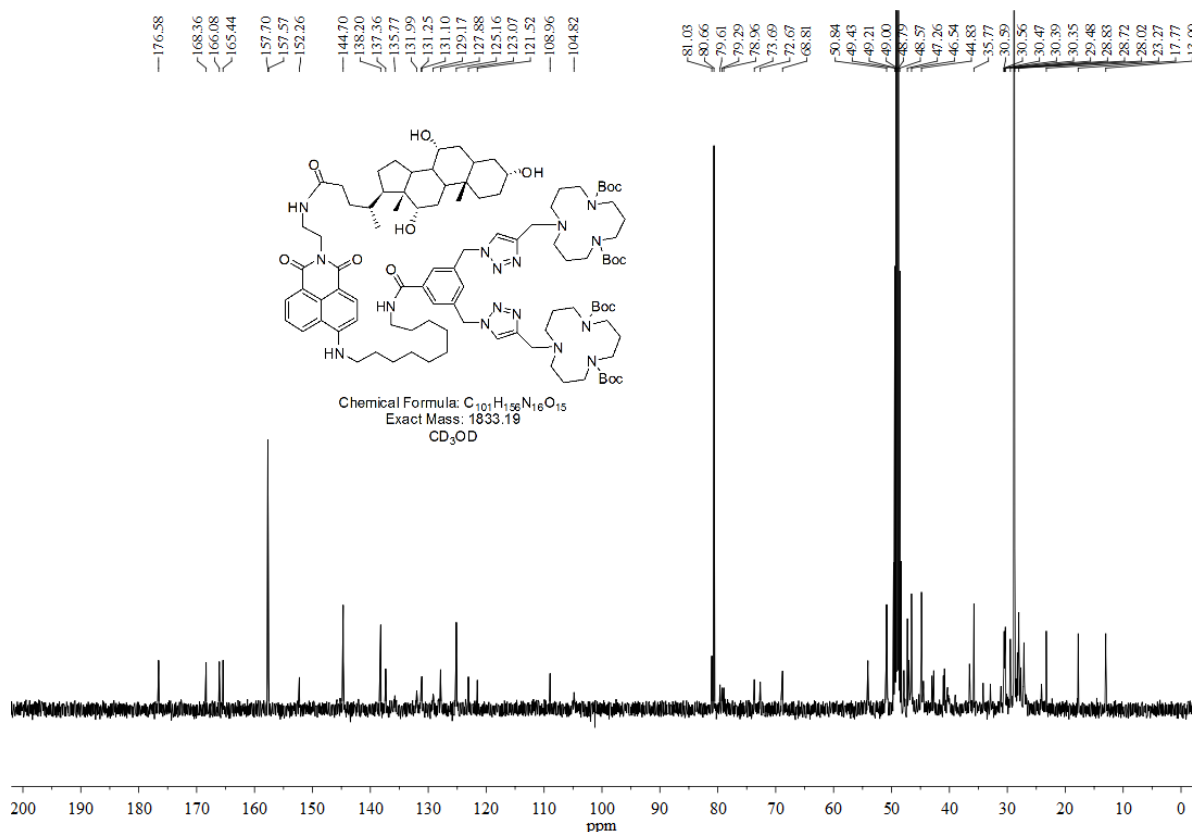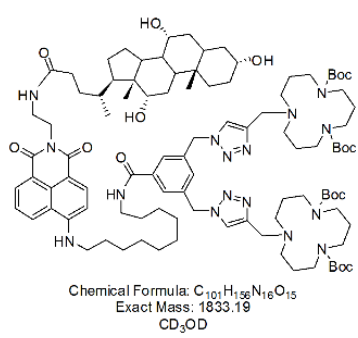

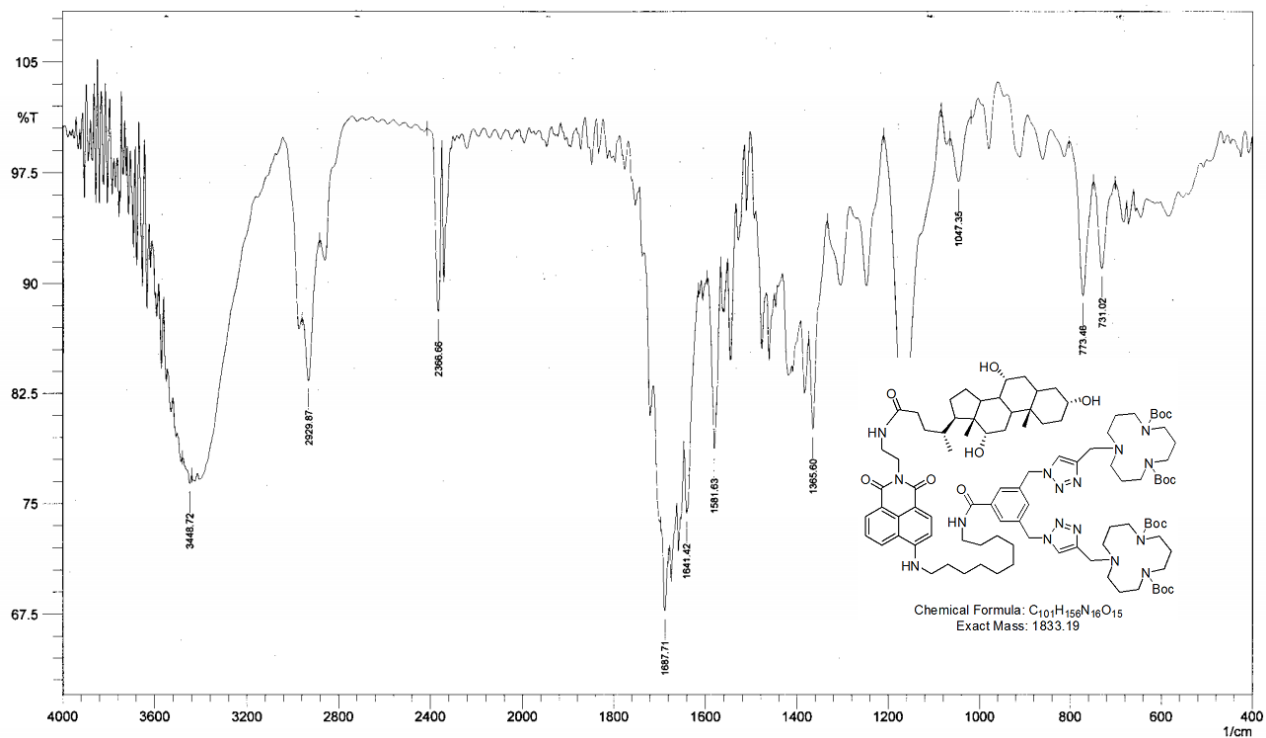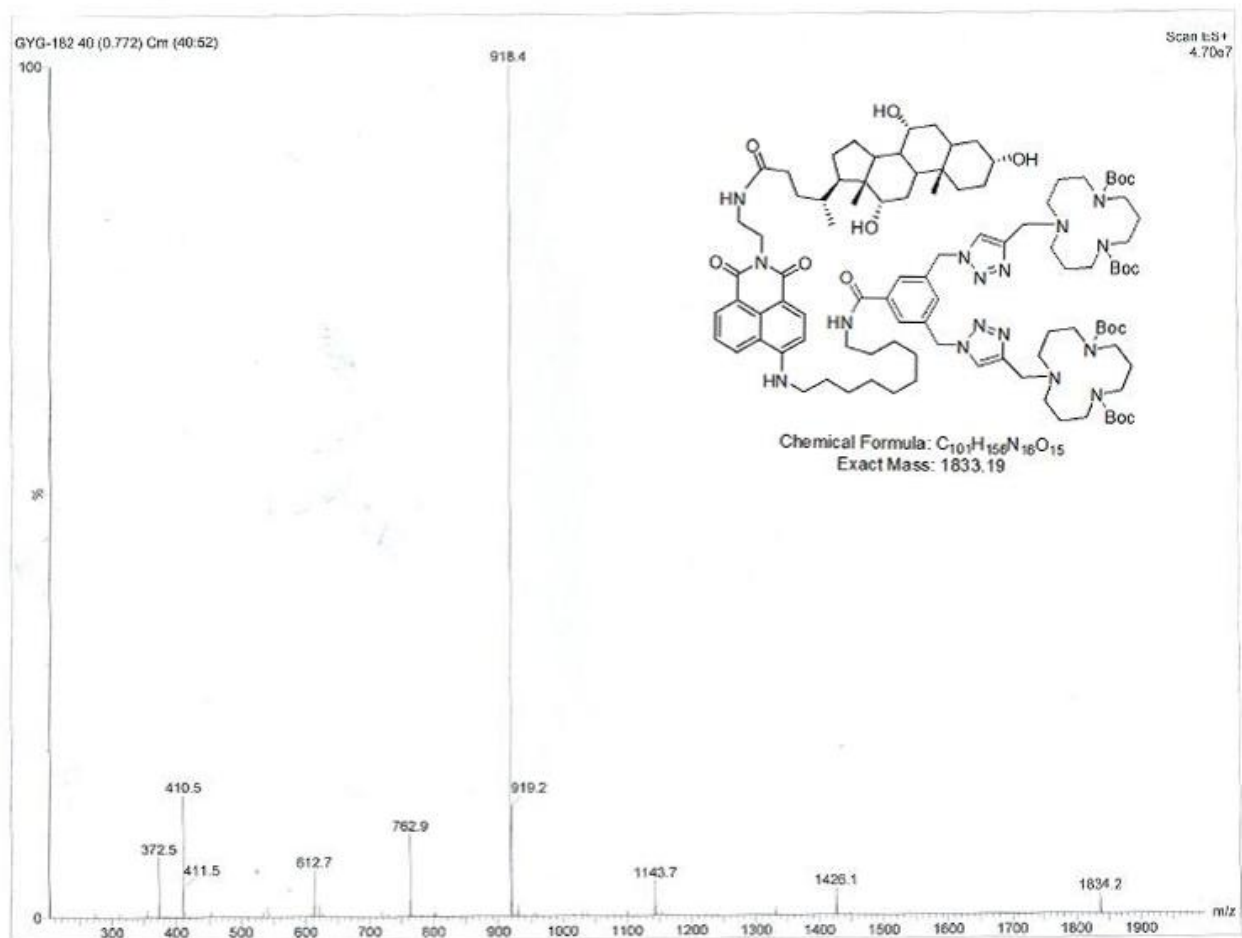

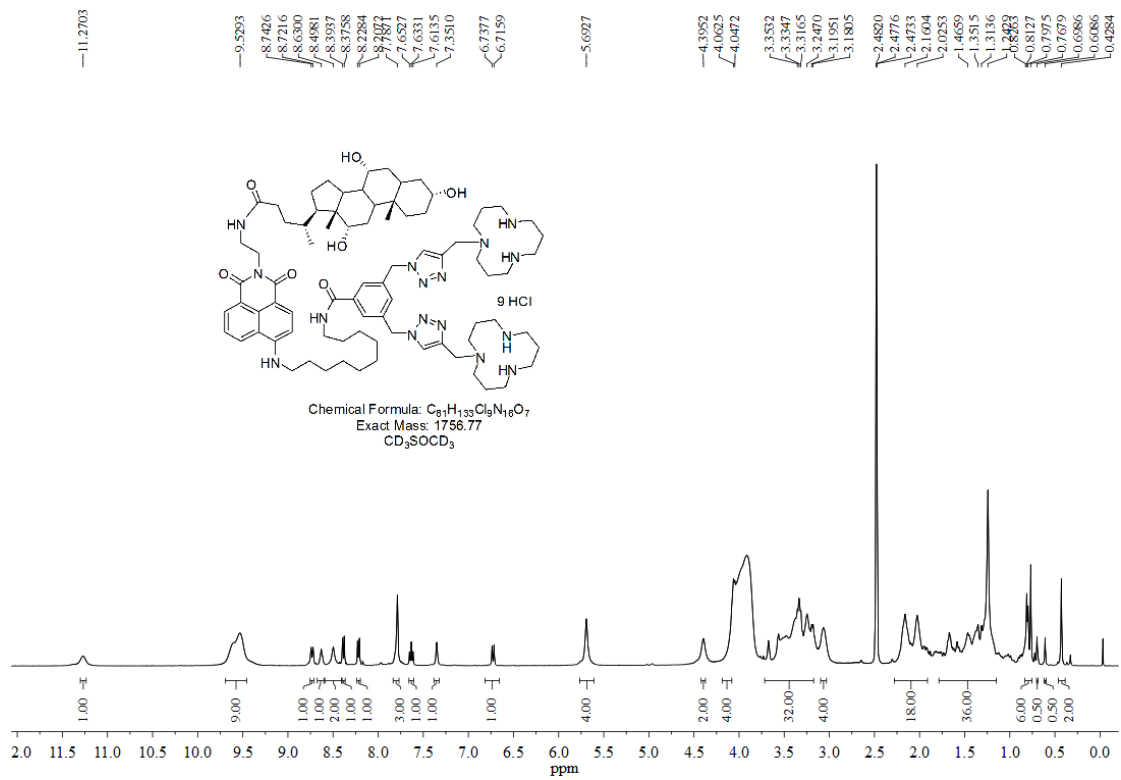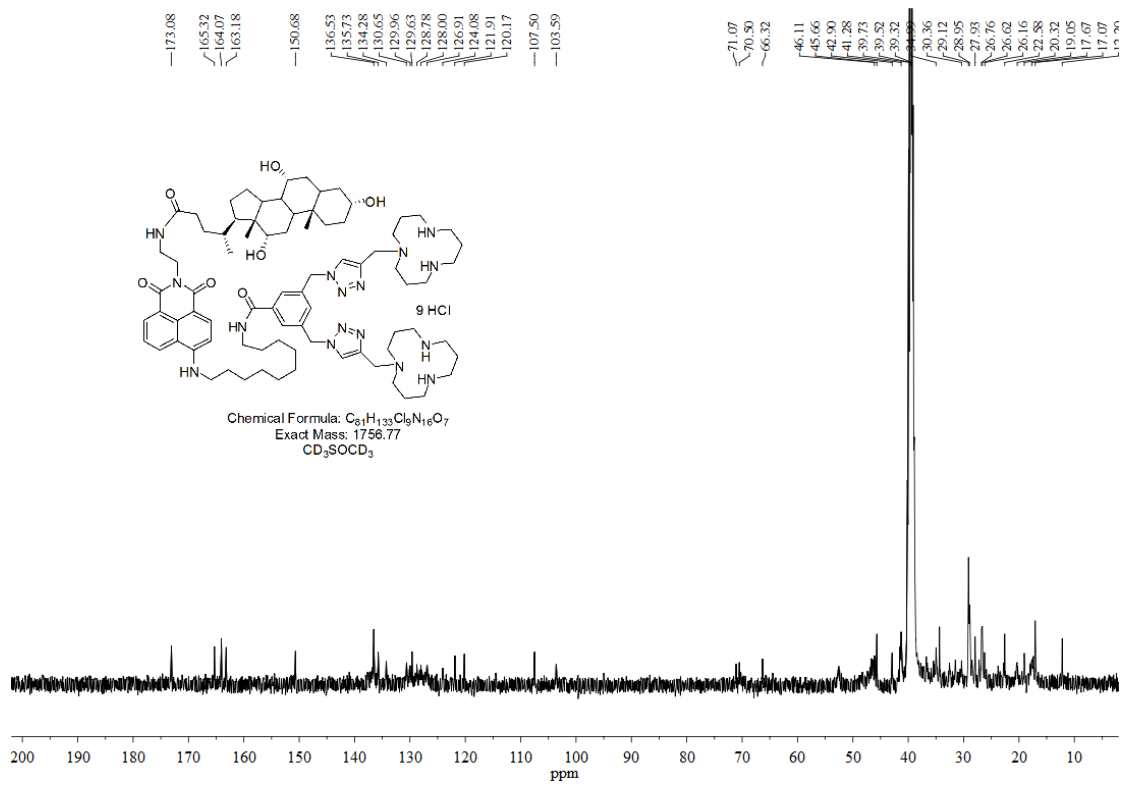

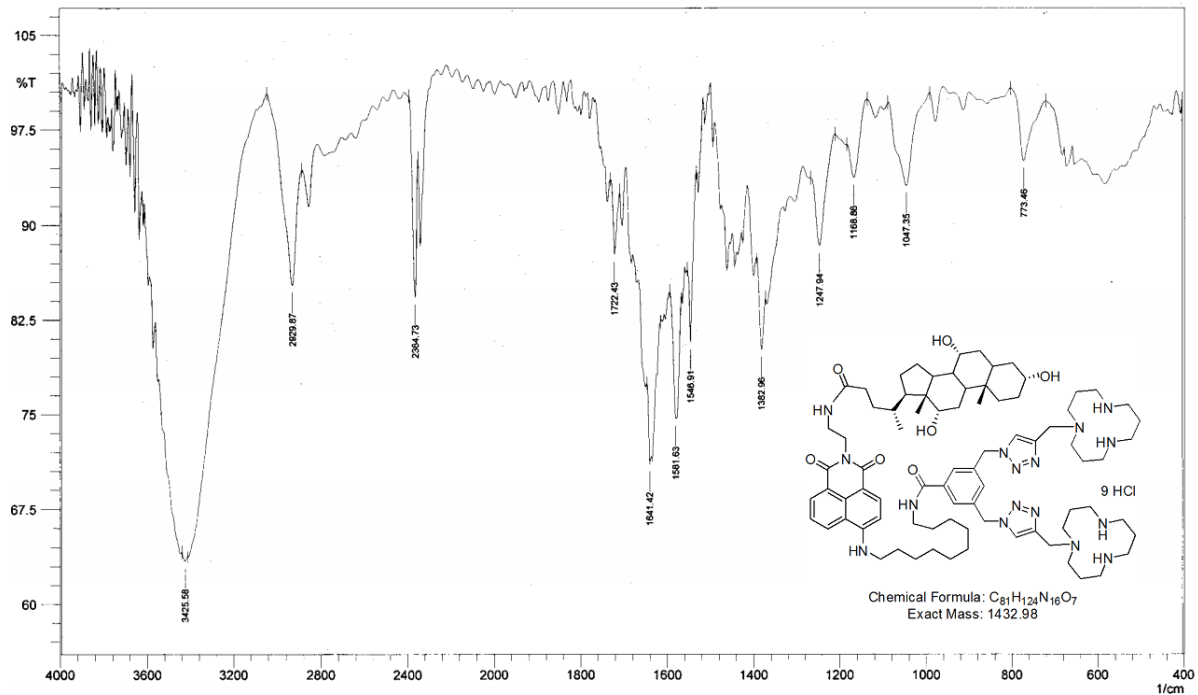

### Elemental Composition Report

#### Single Mass Analysis

Tolerance = 5.0 PPM / DBE: min = -1.5, max = 100.0

Element prediction: Off

Number of isotope peaks used for i-FIT = 2

Monoisotopic Mass, Even Electron Ions

1751 formula(e) evaluated with 16 results within limits (up to 100 closest results for each mass)

Elements Used:

C: 0-100 H: 0-130 N: 0-20 O: 0-10

GYG-184.2 (0.034)

TOF MS ES+

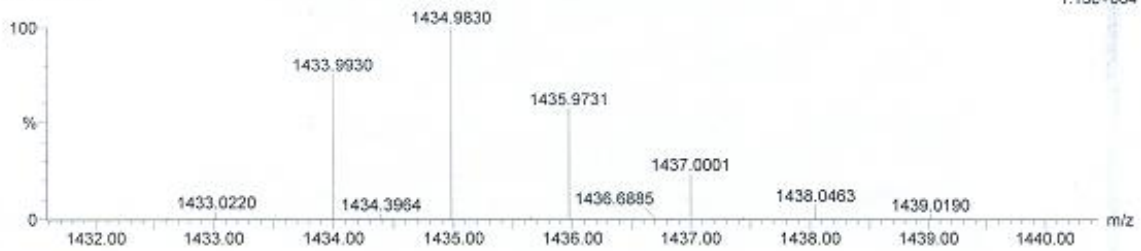

Minimum:

Maximum: 5.0 5.0 -1.5

| Mass      | Calc. Mass | mDa  | PPM  | DBE  | i-FIT | Formula         |
|-----------|------------|------|------|------|-------|-----------------|
| 1433.9930 | 1433.9931  | -0.1 | -0.1 | 32.5 | 195.6 | C82 H121 N20 O3 |
|           | 1433.9926  | 0.4  | 0.3  | 39.5 | 69.2  | C97 H125 N8 O2  |
|           | 1433.9917  | 1.3  | 0.9  | 27.5 | 229.5 | C81 H125 N16 O7 |
|           | 1433.9944  | -1.4 | -1.0 | 26.5 | 196.2 | C85 H129 N10 O9 |
|           | 1433.9912  | 1.8  | 1.3  | 34.5 | 87.3  | C96 H129 N4 O6  |
|           | 1433.9957  | -2.7 | -1.9 | 31.5 | 166.6 | C86 H125 N14 O5 |
|           | 1433.9899  | 3.1  | 2.2  | 40.5 | 86.8  | C93 H121 N14    |
|           | 1433.9891  | 3.9  | 2.7  | 98.5 | 124.6 | C91 N13 O10     |
|           | 1433.9971  | -4.1 | -2.9 | 36.5 | 139.4 | C87 H121 N18 O  |
|           | 1433.9885  | 4.5  | 3.1  | 35.5 | 107.8 | C92 H125 N10 O4 |
|           | 1433.9877  | 5.3  | 3.7  | 23.5 | 307.0 | C76 H125 N18 O9 |
|           | 1433.9984  | -5.4 | -3.8 | 30.5 | 140.7 | C90 H129 N8 O7  |
|           | 1433.9872  | 5.8  | 4.0  | 30.5 | 131.8 | C91 H129 N6 O8  |
|           | 1433.9989  | -5.9 | -4.1 | 23.5 | 318.9 | C75 H125 N20 O8 |
|           | 1433.9998  | -6.8 | -4.7 | 35.5 | 117.1 | C91 H125 N12 O3 |
|           | 1433.9858  | 7.2  | 5.0  | 36.5 | 131.5 | C88 H121 N16 O2 |
